# Supplementary material for: Brief communication: Stream microbes preferentially respire young carbon within the ancient glacier dissolved organic carbon pool
Source: Copernicus journal article supplement (doi:10.5194/tc-19-2769-2025), 2025-08-04
Supplement: Supplementary file 1 [file tc-19-2769-2025-supplement.pdf]

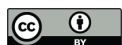

*Supplement of*

**Brief communication: Stream microbes preferentially respire young carbon within the ancient glacier dissolved organic carbon pool**

**Amy D. Holt et al.**

*Correspondence to:* Amy D. Holt (adh19d@fsu.edu)

The copyright of individual parts of the supplement might differ from the article licence.

### **Sect. S1 Description of C<sub>3</sub> and C<sub>4</sub> Vegetation**

Plants can be divided into two main groups based on photosynthetic pathway (e.g., Hobbie and Werner, 2003; Langdale., 2011 and references there in). The C<sub>3</sub> photosynthetic pathway produces a 3-carbon acid as a result of carbon fixation using the Calvin cycle, whereas C<sub>4</sub> plants produce a 4-carbon containing compound following the Hatch-Slack pathway (Hobbie and Werner., 2003). C<sub>3</sub> plants make up the majority (~95% of biomass) of the world's plants and comprise trees, shrubs, and flowering plants. C<sub>3</sub> plants are typically found in moist, temperate to cold climates (Still et al., 2003). C<sub>4</sub> plants (~5% of biomass) are typically found in hot, dry regions and include most tropical species of grass and agricultural crops like maize and sugar cane (Still et al., 2003). The C<sub>4</sub> photosynthetic pathway is a more recent (~30 Mya) adaptation to conserving water and reducing photorespiration in hot, arid climates (Langdale., 2011). Differences in photorespiration pathways between C<sub>3</sub> and C<sub>4</sub> plants result in variances in isotopic fractionation (i.e., differences in <sup>13</sup>C:<sup>12</sup>C ratios), meaning that the contribution of carbon from the two plant groups can be distinguished in environmental samples, including of dissolved organic carbon (e.g., Khon., 2010; Drake et al., 2020). C<sub>4</sub> plants (δ<sup>13</sup>C -14 to -10 ‰; Cerling et al., 1993, 1997) are enriched in <sup>13</sup>C in comparison to C<sub>3</sub> plants (δ<sup>13</sup>C -37 to -20 ‰; Khon., 2010).

**Table S1.** Number of formulae and relative abundance (RA) weighted mass, H/C and O/C ratio, nominal oxidation state of carbon (NOSC; Riedel et al., 2012), and modified aromaticity index (AI<sub>mod</sub>; Koch and Dittmar 2016), together with the percent RA of each compound and heteroatom class

|                          | Eagle<br>Glacier | Herbert<br>Glacier | Mendenhall<br>Glacier | Mendenhall<br>Supraglacial |
|--------------------------|------------------|--------------------|-----------------------|----------------------------|
| Formulae (#)             | 15,537           | 18,793             | 17,709                | 16,077                     |
| Mass (Da)                | 495.1            | 544.4              | 510.2                 | 493.9                      |
| H/C                      | 1.27             | 1.27               | 1.26                  | 1.32                       |
| O/C                      | 0.46             | 0.48               | 0.48                  | 0.45                       |
| NOSC                     | -0.3             | -0.27              | -0.25                 | -0.37                      |
| AI <sub>mod</sub>        | 0.24             | 0.22               | 0.23                  | 0.21                       |
| Highly Unsaturated and   |                  |                    |                       |                            |
| Phenolic (% RA)          | 68.7             | 73.0               | 70.6                  | 58.4                       |
| Aliphatics (% RA)        | 22.6             | 21.0               | 21.5                  | 34.2                       |
| Polyphenolic (% RA)      | 7.0              | 5.3                | 6.6                   | 5.9                        |
| Condensed Aromatic (%RA) | 1.7              | 0.6                | 1.1                   | 1.4                        |
| CHO (% RA)               | 79.5             | 75.5               | 75.9                  | 74.6                       |
| CHON (% RA)              | 16.7             | 19.2               | 18.6                  | 15.4                       |
| CHOS (% RA)              | 3.8              | 5.3                | 5.4                   | 9                          |
| CHONS (% RA)             | 0                | 0                  | 0.1                   | 1                          |

**Table S2:** Quantities of CO<sub>2</sub> produced during respiratory carbon recovery bioincubations

|                        | Eagle Glacier<br>Outflow | Herbert Glacier<br>Outflow | Mendenhall Glacier<br>Outflow | Mendenhall Supraglacial<br>Stream |
|------------------------|--------------------------|----------------------------|-------------------------------|-----------------------------------|
| CO <sub>2</sub> (mg C) | 0.3                      | 0.3                        | 0.3                           | 0.2                               |

## References

- Cerling, T. E., Wang, Y., and Quade, J.: Expansion of C4 ecosystems as an indicator of global ecological change in the late Miocene, *Nature*, 361, 344-345, 1993.
- Cerling, T. E., Harris, J. M., MacFadden, B. J., Leakey, M. G., Quade, J., Eisenmann, V., and Ehleringer, J. R.: Global vegetation change through the Miocene/Pliocene boundary, *Nature*, 389, 153-158, 1997.
- Drake, T. W., Wagner, S., Stubbins, A., Wabakanghanzi, J. N., Dinga, J. B., Six, J., and Spencer, R. G.: Du Feu à l'Eau: Source and Flux of Dissolved Black Carbon From the Congo River, *Global Biogeochemical Cycles*, 34, e2020GB006560, 2020.
- Hobbie, E. and Werner, R. A.: Intramolecular, compound-specific, and bulk carbon isotope patterns in C3 and C4 plants: a review and synthesis, *New Phytologist*, 161, 371-385, 2004.
- Koch, B. and Dittmar, T.: From mass to structure: an aromaticity index for high-resolution mass data of natural organic matter, *Rapid Commun. Mass Sp.*, 30, 250–250, 2016.
- Langdale, J. A.: C4 cycles: past, present, and future research on C4 photosynthesis, *The Plant Cell*, 23, 3879-3892, 2011.
- Riedel, T., Biester, H., and Dittmar, T.: Molecular fractionation of dissolved organic matter with metal salts, *Environmental Science & Technology*, 46, 4419-4426, 2012.
- Still, C. J., Berry, J. A., Collatz, G. J., and DeFries, R. S.: Global distribution of C3 and C4 vegetation: carbon cycle implications, *Global biogeochemical cycles*, 17, 6-1-6-14, 2003
